# Supplementary material for: Spaceflight-Induced Gene Expression Profiles in the Mouse Brain Are Attenuated by Treatment with the Antioxidant BuOE
Source: Int J Mol Sci. 2023 Sep 1;24(17):13569. doi: 10.3390/ijms241713569 (PMC10487739; doi:10.3390/ijms241713569)
Supplement: Supplementary file 1 [file ijms-24-13569-s001.zip › Supplementary File S2.txt]

DEG	brain region	log2 FC	Associated disease
Actb	CA	0.710580811	Fryns-Aftimos Syndrome; Iris Coloboma with Ptosis, Hypertelorism, and Mental Retardation
Arc	CA	-0.713220493	Alzheimer's Disease
Bhlhe40	CA	-0.62359469	Advanced Sleep Phase Syndrome; Delayed Sleep Phase Syndrome
Camk2b	CA	0.644063916	Hashish Abuse
Casp9	CA	0.715724229	Alzheimer's Disease
Cck	CA	0.771231332	Alcohol withdrawal syndrome
Chat	CA	0.808525195	Alzheimer's Disease
Eno1	CA	0.602419722	Alzheimer's Disease
Ercc2	CA	0.682242131	Cerebrooculofacioskeletal Syndrome 2
Nfil3	CA	-0.786486211	Advanced Sleep Phase Syndrome; Delayed Sleep Phase Syndrome
Pigv	CA	0.899811685	Hyperphosphatasia with Mental Retardation
Sncb	CA	0.628062979	Lewy Body Disease
Srd5a3	CA	0.649631397	Creutzfeldt-Jakob disease; Kahrizi Syndrome
Aldh1b1	DG	-0.603832134	succinic semialdehyde dehydrogenase deficiency
Camk2b	DG	0.589675291	Hashish Abuse
Dnm1	DG	0.64567922	Alzheimer's Disease
Prepl	DG	0.658017595	Hypotonia-Cystinuria Syndrome
Ptgs1	DG	0.660142826	Alzheimer's Disease; Insufficient Sleep Syndrome; REM Sleep Deprivation
Sst	DG	1.134974287	Dementia, Vascular
Syp	DG	0.692433387	Alzheimer's Disease
Arc	FCT	-2.011252505	Alzheimer's Disease
Arx	FCT	0.719046688	Proud Syndrome
Glul	FCT	0.681325171	Alcohol withdrawal syndrome
Pde5a	FCT	0.618413878	Erectile dysfunction
Arc	CT	-1.566376061	Alzheimer's Disease
Prepl	CT	0.597597692	Hypotonia-Cystinuria Syndrome
